# Supplementary material for: Cannabis for the Treatment of Fibromyalgia: A Systematic Review
Source: MDPI journal article supplement (doi:10.3390/biomedicines11061621), 2023-06-02
Supplement: s1 [file s1]

Table S2. Excluded articles

| Authors                   | Reason for exclusion     |
|---------------------------|--------------------------|
| Lynch and Campbell (2011) | Review article           |
| Habib and Avisar (2018)   | Wrong study design       |
| Berger et al. (2020)      | Review article           |
| Mazza (2021)              | Wrong study design       |
| Fitzcharles et al. (2021) | Review article           |
| Habib and Amar (2022)     | Multiple pain etiologies |
| Boehnke et al. (2022)     | Wrong study design       |
| Van Dam et al. (2023)     | Active clinical trial    |

#### References:

1. Habib G, Avisar I. The Consumption of Cannabis by Fibromyalgia Patients in Israel. *Pain Res Treat.* 2018;2018:7829427. Published 2018 Jul 22. doi:10.1155/2018/7829427
2. Mazza M. Medical cannabis for the treatment of fibromyalgia syndrome: a retrospective, open-label case series. *J Cannabis Res.* 2021;3(1):4. Published 2021 Feb 17. doi:10.1186/s42238-021-00060-6
3. Fitzcharles MA, Petzke F, Tölle TR, Häuser W. Cannabis-Based Medicines and Medical Cannabis in the Treatment of Nociceptive Pain. *Drugs.* 2021;81(18):2103-2116. doi:10.1007/s40265-021-01602-1
4. Habib G, Amar S. Metabolic effects of medical cannabis treatment. *J Investig Med.* 2022;70(2):446-448. doi:10.1136/jim-2021-002059
5. van Dam CJ, van Velzen M, Kramers C, et al. Cannabis-opioid interaction in the treatment of fibromyalgia pain: an open-label, proof of concept study with randomization between treatment groups: cannabis, oxycodone or cannabis/oxycodone combination-the SPIRAL study. *Trials.* 2023;24(1):64. Published 2023 Jan 27. doi:10.1186/s13063-023-07078-6
6. Boehnke KF, Gagnier JJ, Matallana L, Williams DA. Cannabidiol Product Dosing and Decision-Making in a National Survey of Individuals with Fibromyalgia. *J Pain.* 2022;23(1):45-54. doi:10.1016/j.jpain.2021.06.007
7. Lynch ME, Campbell F. Cannabinoids for treatment of chronic non-cancer pain; a systematic review of randomized trials. *Br J Clin Pharmacol.* 2011;72(5):735-744. doi:10.1111/j.1365-2125.2011.03970.x
8. Berger AA, Keefe J, Winnick A, et al. Cannabis and cannabidiol (CBD) for the treatment of fibromyalgia. *Best Pract Res Clin Anaesthesiol.* 2020;34(3):617-631. doi:10.1016/j.bpa.2020.08.010
