# Supplementary material for: Cannabis for the Treatment of Fibromyalgia: A Systematic Review
Source: MDPI journal article supplement (doi:10.3390/biomedicines11061621), 2023-06-02
Supplement: s1 [file s1]

**Table S1.** Database Search strategy

| Search strategies                                                                                                                                                | Results |
|------------------------------------------------------------------------------------------------------------------------------------------------------------------|---------|
| <b>MEDLINE</b>                                                                                                                                                   |         |
| #1: <i>"fibromyalgia"</i> OR <i>"central sensitization"</i> OR <i>"chronic pain"</i>                                                                             |         |
| #2: <i>"medical cannabis"</i> OR <i>"cannabis"</i> OR <i>"cannabinoids"</i>                                                                                      | 363     |
| #3: <i>"randomized controlled trial"</i> OR <i>"controlled clinical trial"</i> OR <i>"randomized"</i> OR <i>"placebo"</i> OR <i>"randomly"</i> OR <i>"trial"</i> |         |
| #4: #1 AND #2 AND #3                                                                                                                                             |         |
| <b>EMBASE</b>                                                                                                                                                    |         |
| #1: <i>"fibromyalgia"</i> OR <i>"central sensitization"</i> OR <i>"chronic pain"</i>                                                                             |         |
| #2: <i>"medical cannabis"</i> OR <i>"cannabis"</i> OR <i>"cannabinoids"</i>                                                                                      | 604     |
| #3: <i>"randomized controlled trial"</i> OR <i>"controlled clinical trial"</i> OR <i>"randomized"</i> OR <i>"placebo"</i> OR <i>"randomly"</i> OR <i>"trial"</i> |         |
| #4: #1 AND #2 AND #3                                                                                                                                             |         |
| <b>Cochrane Central Register of Controlled Trials</b>                                                                                                            |         |
| #1: <i>"fibromyalgia"</i> OR <i>"central sensitization"</i> OR <i>"chronic pain"</i>                                                                             |         |
| #2: <i>"medical cannabis"</i> OR <i>"cannabis"</i> OR <i>"cannabinoids"</i>                                                                                      | 182     |
| #3: <i>"randomized controlled trial"</i> OR <i>"controlled clinical trial"</i> OR <i>"randomized"</i> OR <i>"placebo"</i> OR <i>"randomly"</i> OR <i>"trial"</i> |         |
| #4: #1 AND #2 AND #3                                                                                                                                             |         |
| <b>Cochrane Database of Systematic Reviews</b>                                                                                                                   |         |
| #1: <i>"fibromyalgia"</i> OR <i>"central sensitization"</i> OR <i>"chronic pain"</i>                                                                             |         |
| #2: <i>"medical cannabis"</i> OR <i>"cannabis"</i> OR <i>"cannabinoids"</i>                                                                                      | 21      |
| #3: <i>"randomized controlled trial"</i> OR <i>"controlled clinical trial"</i> OR <i>"randomized"</i> OR <i>"placebo"</i> OR <i>"randomly"</i> OR <i>"trial"</i> |         |
| #4: #1 AND #2 AND #3                                                                                                                                             |         |
| <b>Scopus</b>                                                                                                                                                    |         |
| #1: <i>"fibromyalgia"</i> OR <i>"central sensitization"</i> OR <i>"chronic pain"</i>                                                                             |         |
| #2: <i>"medical cannabis"</i> OR <i>"cannabis"</i> OR <i>"cannabinoids"</i>                                                                                      | 39      |
| #3: <i>"randomized controlled trial"</i> OR <i>"controlled clinical trial"</i> OR <i>"randomized"</i> OR <i>"placebo"</i> OR <i>"randomly"</i> OR <i>"trial"</i> |         |
| #4: #1 AND #2 AND #3                                                                                                                                             |         |
